# Supplementary material for: Hydrogen-bonded assemblies of iron(ii) spin crossover complexes
Source: Royal Society of Chemistry journal article supplement (doi:10.1039/d4dt00579a), 2024-01-01
Supplement: d4dt00579a1.pdf [file d4dt00579a1.pdf]

## Supplementary Information

### Hydrogen-bonded assemblies of iron(II) spin crossover complexes

Verónica Jornet-Mollá, Marina I. Rodríguez-Tarrazó, Miquel J. Dolz Lozano, Carlos Giménez-Saiz and Francisco M. Romero\*

**Table S1** Octahedral distortion parameters of the Fe<sup>2+</sup> cations present in compounds **1-3** obtained from X-ray data.

|                 | <b>1</b>   | <b>2</b>   | <b>3</b>   |
|-----------------|------------|------------|------------|
| $\varphi$ / deg | 178.36(16) | 177.89(15) | 164.94(11) |
| $\Sigma$ / deg  | 99(2)      | 98(2)      | 144(1)     |

**Table S2.** Intermolecular hydrogen bonds in the crystal structure of **1**.<sup>a</sup>

| <b>D–H…A</b>     | <b>d(D–H)/Å</b> | <b>d(H…A)/Å</b> | <b>d(D…A)/Å</b> | <b>&lt;(D–H…A)/deg</b> |
|------------------|-----------------|-----------------|-----------------|------------------------|
| N1–H1N…O2_#4     | 0.88(2)         | 1.85(3)         | 2.675(5)        | 156(5)                 |
| N5–H5N…O1_#5     | 0.90(2)         | 1.80(3)         | 2.696(5)        | 177(5)                 |
| N6–H6N…O1W       | 0.89(3)         | 1.95(3)         | 2.769(5)        | 152(5)                 |
| N10–H10N…O4      | 0.89(2)         | 1.84(3)         | 2.728(4)        | 174(4)                 |
| O1W–H1W1…O4_#6   | 0.82(2)         | 1.86(3)         | 2.667(5)        | 167(6)                 |
| O2W–H2W1…O3      | 0.84(3)         | 2.09(3)         | 2.921(5)        | 171(5)                 |
| O2W–H2W2…O5W     | 0.81(3)         | 2.06(3)         | 2.859(6)        | 166(6)                 |
| O3W–H3W1…O1_#7   | 0.78(2)         | 2.11(3)         | 2.884(5)        | 177(6)                 |
| O3W–H3W2…O7W     | 0.79(2)         | 1.98(3)         | 2.721(5)        | 156(5)                 |
| O4W–H4W1…O8W_#1  | 0.91(3)         | 2.00(4)         | 2.763(6)        | 141(6)                 |
| O4W–H4W2…O1W     | 0.88(3)         | 1.99(3)         | 2.857(6)        | 169(7)                 |
| O5W–H5W1…O3W_#8  | 0.86(3)         | 2.00(3)         | 2.836(6)        | 164(6)                 |
| O5W–H5W2…O8W     | 0.86(3)         | 1.95(3)         | 2.791(6)        | 165(6)                 |
| O6W–H6W1…O4W_#9  | 0.83(3)         | 2.04(5)         | 2.803(6)        | 152(9)                 |
| O6W–H6W2…O2      | 0.82(3)         | 2.16(6)         | 2.908(6)        | 151(10)                |
| O7W–H7W1…O4W_#2  | 0.84(3)         | 2.01(3)         | 2.833(7)        | 167(4)                 |
| O7W–H7W2…O3      | 0.83(3)         | 1.95(3)         | 2.728(5)        | 157(7)                 |
| O8W–H8W1…O9W_#10 | 0.85(2)         | 1.91(3)         | 2.738(6)        | 165(6)                 |
| O8W–H8W2…O7W     | 0.87(2)         | 1.96(3)         | 2.820(6)        | 168(5)                 |
| O9W–H9W1…O6W_#11 | 0.86(3)         | 1.96(3)         | 2.795(7)        | 163(6)                 |
| O9W–H9W2…O2W_#7  | 0.86(3)         | 2.13(5)         | 2.825(6)        | 137(7)                 |

<sup>a</sup>Symmetry transformations used to generate equivalent atoms:

|                           |                          |                          |
|---------------------------|--------------------------|--------------------------|
| #1 $-x+1/2, -y+1, z+1/2$  | #2 $-x+1, y+1/2, -z+3/2$ | #3 $-x+1/2, -y+2, z+1/2$ |
| #4 $x+1/2, -y+3/2, -z+2$  | #5 $x+1, y, z$           | #6 $-x+1, y-1/2, -z+3/2$ |
| #7 $-x, y-1/2, -z+3/2$    | #8 $x-1/2, -y+3/2, -z+1$ | #9 $x-1/2, -y+3/2, -z+2$ |
| #10 $-x+1/2, -y+1, z-1/2$ | #11 $x, y-1, z$          |                          |

**Table S3** Intermolecular hydrogen bonds in the crystal structure of **2**.<sup>a</sup>

| <b>D–H…A</b>    | <b>d(D–H)/Å</b> | <b>d(H…A)/Å</b> | <b>d(D…A)/Å</b> | <b>&lt;(D–H…A)/deg</b> |
|-----------------|-----------------|-----------------|-----------------|------------------------|
| N1–H1N…O2_#1    | 0.901(19)       | 1.83(3)         | 2.688(5)        | 157(5)                 |
| N5–H5N…O3W      | 0.901(19)       | 1.74(2)         | 2.637(5)        | 171(5)                 |
| N6–H6N…O6_#2    | 0.895(19)       | 1.82(2)         | 2.702(5)        | 166(5)                 |
| N10–H10N…O1W_#3 | 0.901(18)       | 1.82(2)         | 2.694(5)        | 163(4)                 |
| O5–H5O…O1_#4    | 1.12(7)         | 1.38(7)         | 2.499(4)        | 179(6)                 |
| O1W–H1W1…O2W    | 0.802(18)       | 1.90(2)         | 2.697(4)        | 171(5)                 |
| O1W–H1W2…O5W    | 0.824(19)       | 1.83(2)         | 2.644(5)        | 169(5)                 |
| O2W–H2W1…O4_#5  | 0.825(18)       | 1.88(2)         | 2.702(4)        | 176(4)                 |
| O2W–H2W2…O4     | 0.818(18)       | 2.04(2)         | 2.842(4)        | 166(6)                 |
| O3W–H3W1…O4W    | 0.832(19)       | 1.87(2)         | 2.686(5)        | 167(6)                 |
| O3W–H3W2…O2     | 0.823(19)       | 1.987(19)       | 2.796(5)        | 168(5)                 |
| O4W–H4W1…O1W    | 0.838(19)       | 1.96(2)         | 2.775(5)        | 164(6)                 |
| O4W–H4W2…O3     | 0.832(19)       | 1.987(19)       | 2.818(5)        | 177(5)                 |
| O5W–H5W1…O3_#1  | 0.839(19)       | 1.87(2)         | 2.703(5)        | 172(5)                 |
| O5W–H5W2…O2W_#6 | 0.821(18)       | 2.05(2)         | 2.836(5)        | 160(4)                 |

<sup>a</sup> Symmetry transformations used to generate equivalent atoms:

|                         |                                 |
|-------------------------|---------------------------------|
| #1 $x - 1, y, z$        | #2 $x, y, z + 1$                |
| #3 $-x + 1, -y, -z + 1$ | #4 $x - 1/2, -y + 1/2, z - 1/2$ |
| #5 $-x + 2, -y, -z$     | #6 $-x + 1, -y, -z$             |

**Table S4** Intermolecular hydrogen bonds in the crystal structure of **3**.<sup>a</sup>

| <b>D–H...A</b>    | <b>d(D–H)/Å</b> | <b>d(H...A)/Å</b> | <b>d(D...A)/Å</b> | <b>&lt;(D–H...A)/deg</b> |
|-------------------|-----------------|-------------------|-------------------|--------------------------|
| N1–H1N...O1W      | 0.87(2)         | 1.84(3)           | 2.713(5)          | 173(5)                   |
| N5–H5N...O1_#2    | 0.89(3)         | 1.76(3)           | 2.637(4)          | 169(6)                   |
| N6–H6N...O3W_#3   | 0.85(2)         | 1.95(3)           | 2.781(5)          | 165(5)                   |
| N10–H10N...O2_#4  | 0.88(2)         | 1.81(3)           | 2.676(4)          | 166(5)                   |
| O1W–H1W1...O1_#5  | 0.81(2)         | 2.03(2)           | 2.821(4)          | 167(5)                   |
| O1W–H1W2...O2W    | 0.83(2)         | 1.99(3)           | 2.814(5)          | 170(6)                   |
| O2W–H2W1...O4_#4  | 0.85(2)         | 1.93(3)           | 2.779(5)          | 172(6)                   |
| O2W–H2W2...O4W_#4 | 0.86(2)         | 1.96(3)           | 2.799(6)          | 169(5)                   |
| O3W–H3W1...O4_#6  | 0.84(2)         | 1.80(3)           | 2.626(5)          | 167(4)                   |
| O3W–H3W2...O6W    | 0.84(3)         | 1.77(4)           | 2.564(10)         | 156(6)                   |
| O4W–H4W1...O3_#7  | 0.83(3)         | 1.93(3)           | 2.736(6)          | 163(7)                   |
| O4W–H4W2...O5W_#8 | 0.87(2)         | 2.18(4)           | 2.934(5)          | 146(6)                   |
| O5W–H5W1...O3W    | 0.85(2)         | 2.00(3)           | 2.840(6)          | 168(4)                   |
| O6W–H6W1...O3_#5  | 0.81(3)         | 1.77(5)           | 2.550(9)          | 160(10)                  |
| O6W–H6W2...O3_#6  | 0.80(3)         | 2.18(7)           | 2.849(7)          | 141(11)                  |

<sup>a</sup> Symmetry transformations used to generate equivalent atoms:

#1  $x, y - 1, z + 1$       #2  $-x + 2, -y, z$       #3  $-x + 3/2, y - 1/2, -z + 1$   
#4  $x, y - 1, z$       #5  $-x + 2, -y + 1, z$       #6  $x, y, z + 1$   
#7  $x, y + 1, z$

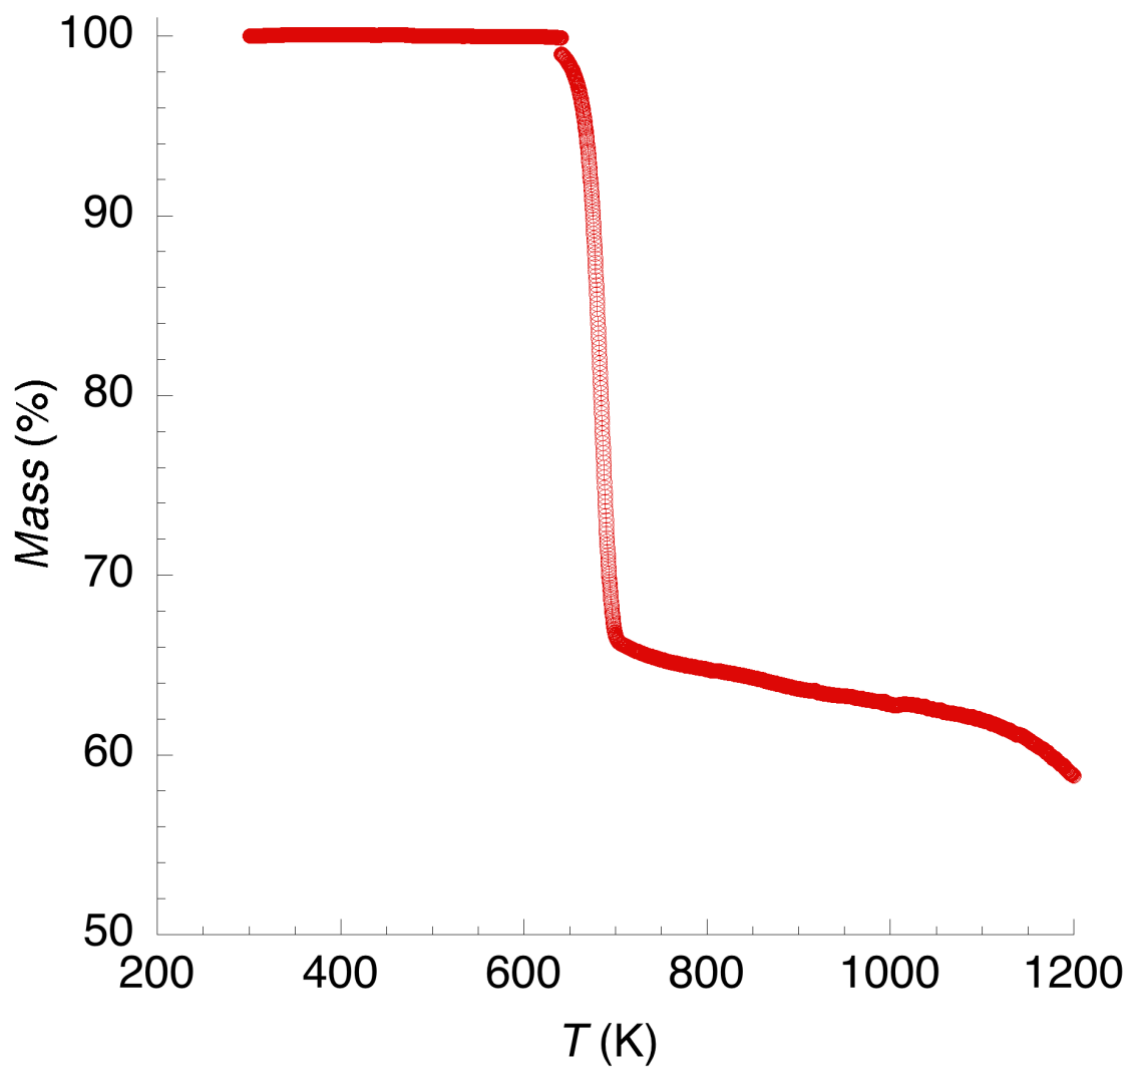

**Fig. S1.** Thermogravimetric analysis of  $\text{Ag}_2(\text{BPDC})$ ,  $\text{BPDC} = \text{C}_{14}\text{H}_8\text{O}_4$ . The plot confirms the anhydrous character of this salt.

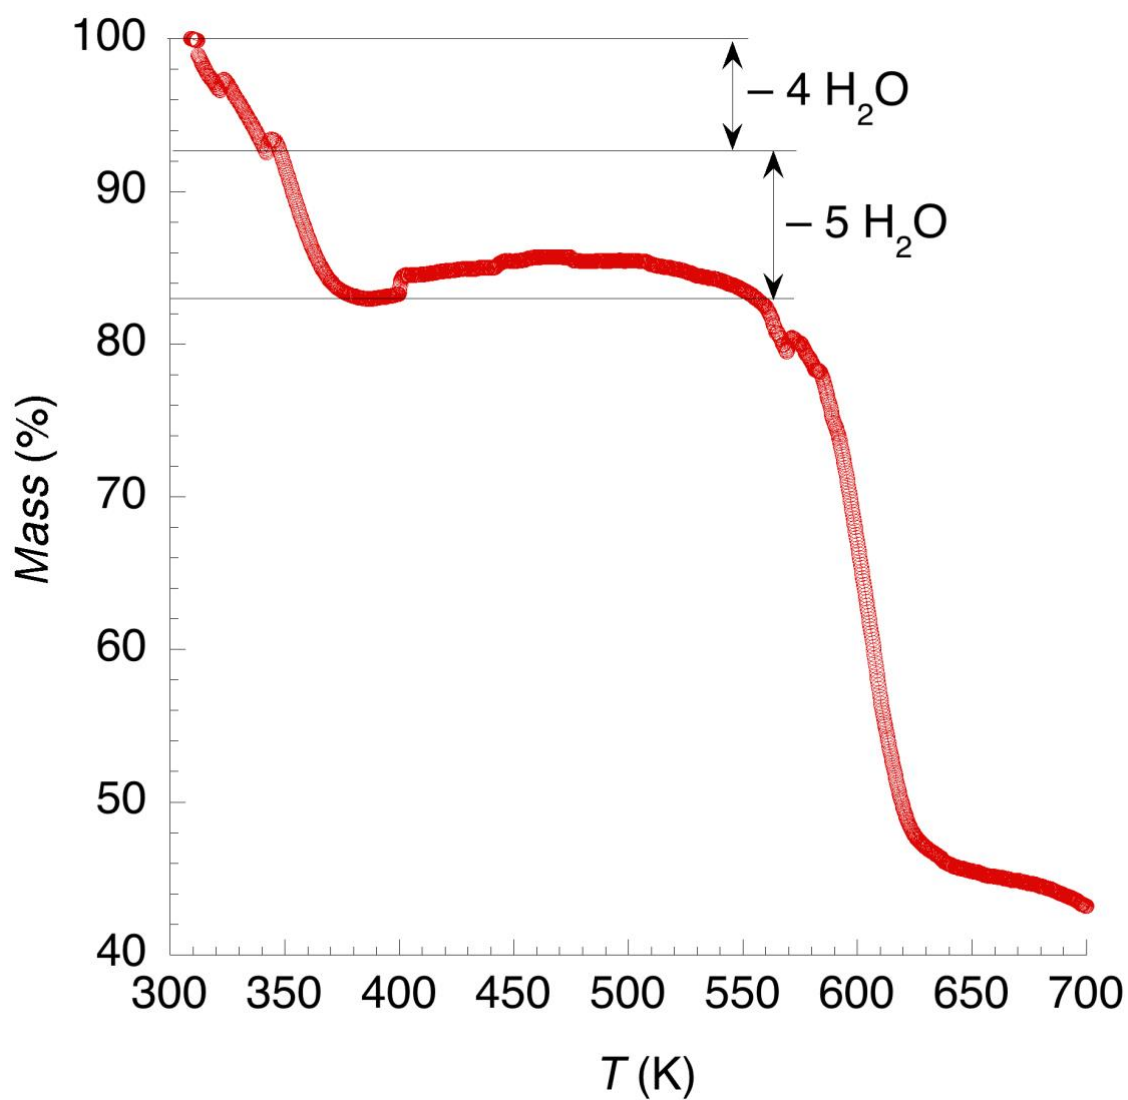

**Fig. S2.** Thermogravimetric analysis of  $[\text{Fe}(\text{bpp})_2](\text{ADC}) \cdot 9\text{H}_2\text{O}$  (**1**),  $\text{bpp} = \text{C}_{11}\text{H}_9\text{N}_5$ ,  $\text{ADC} = \text{C}_{16}\text{H}_8\text{O}_4$ .

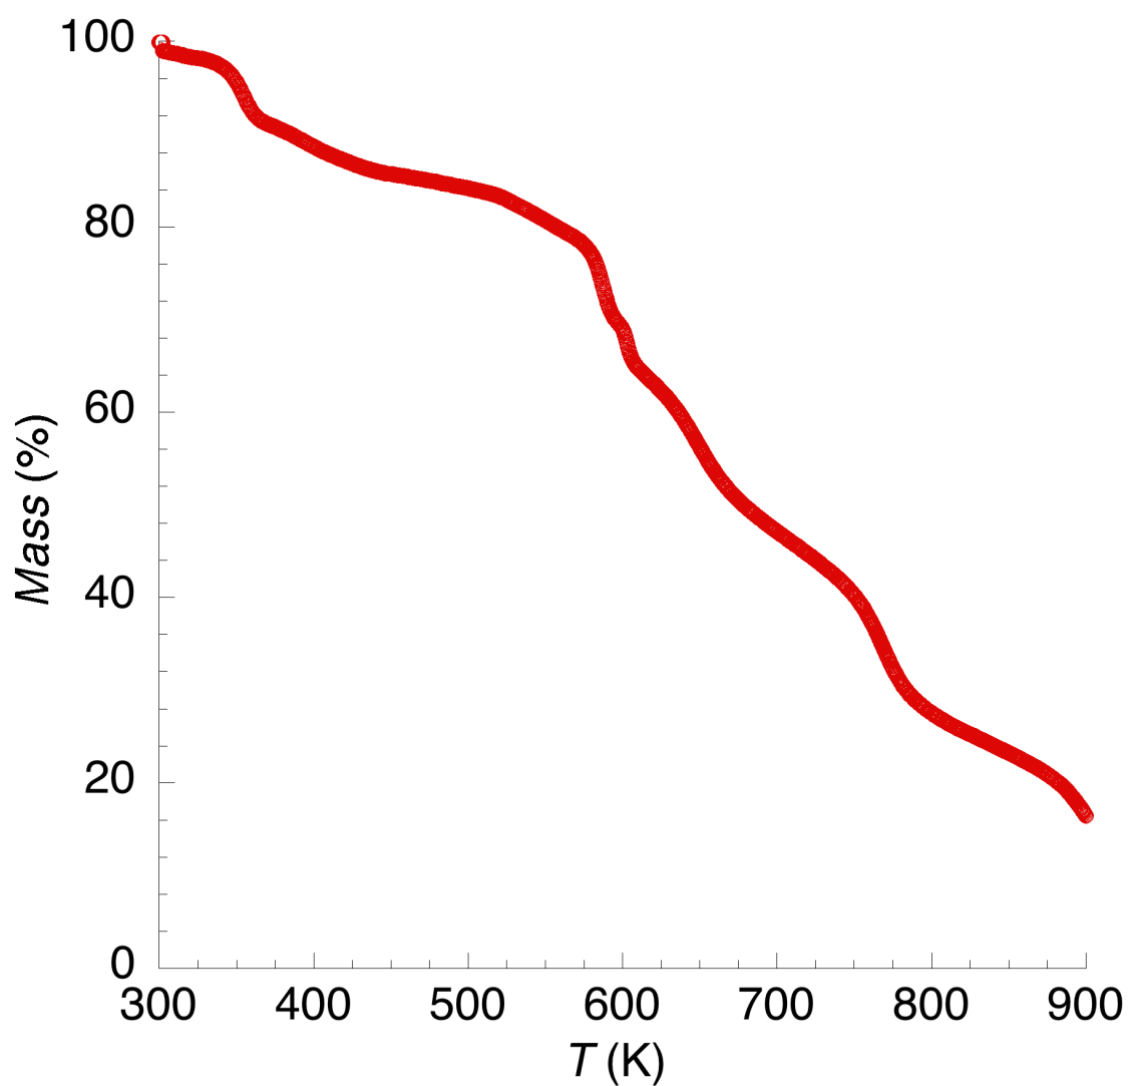

**Fig. S3.** Thermogravimetric analysis of  $[\text{Fe}(\text{bpp})_2](\text{HBTC}) \cdot 5\text{H}_2\text{O}$  (**2**),  $\text{bpp} = \text{C}_{11}\text{H}_9\text{N}_5$ ,  
 $\text{BTC} = \text{C}_9\text{H}_3\text{O}_6$ .

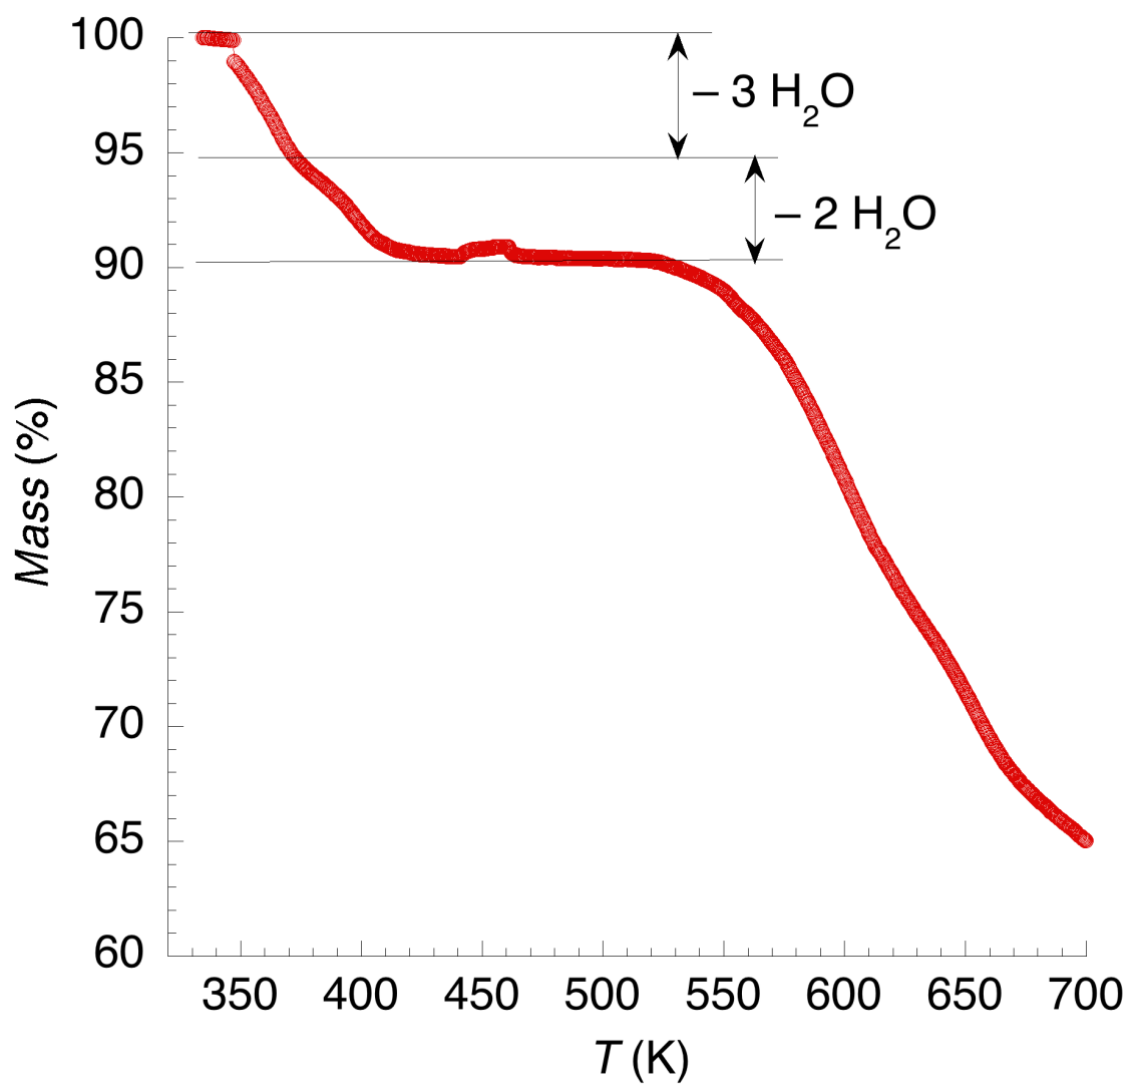

**Fig. S4.** Thermogravimetric analysis of  $[\text{Fe}(\text{bpp})_2](\text{BPDC}) \cdot 5\text{H}_2\text{O}$  (**3**),  $\text{bpp} = \text{C}_{11}\text{H}_9\text{N}_5$ ,  $\text{BPDC} = \text{C}_{14}\text{H}_8\text{O}_4$ .



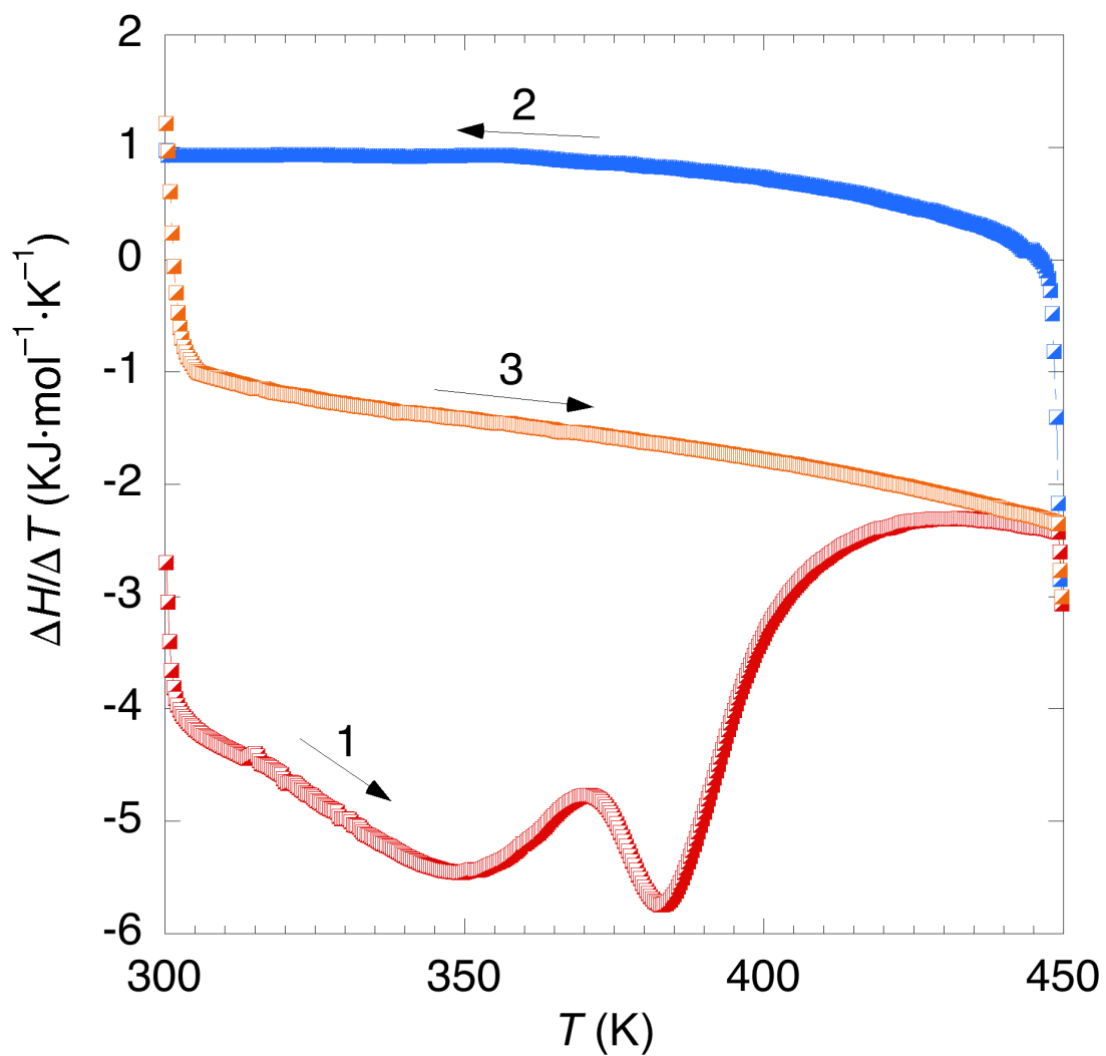

**Fig. S5.** Differential scanning calorimetry of **1**. Curve 1: first heating (dehydration process). Curve 2: first cooling. Curve 3: second heating.

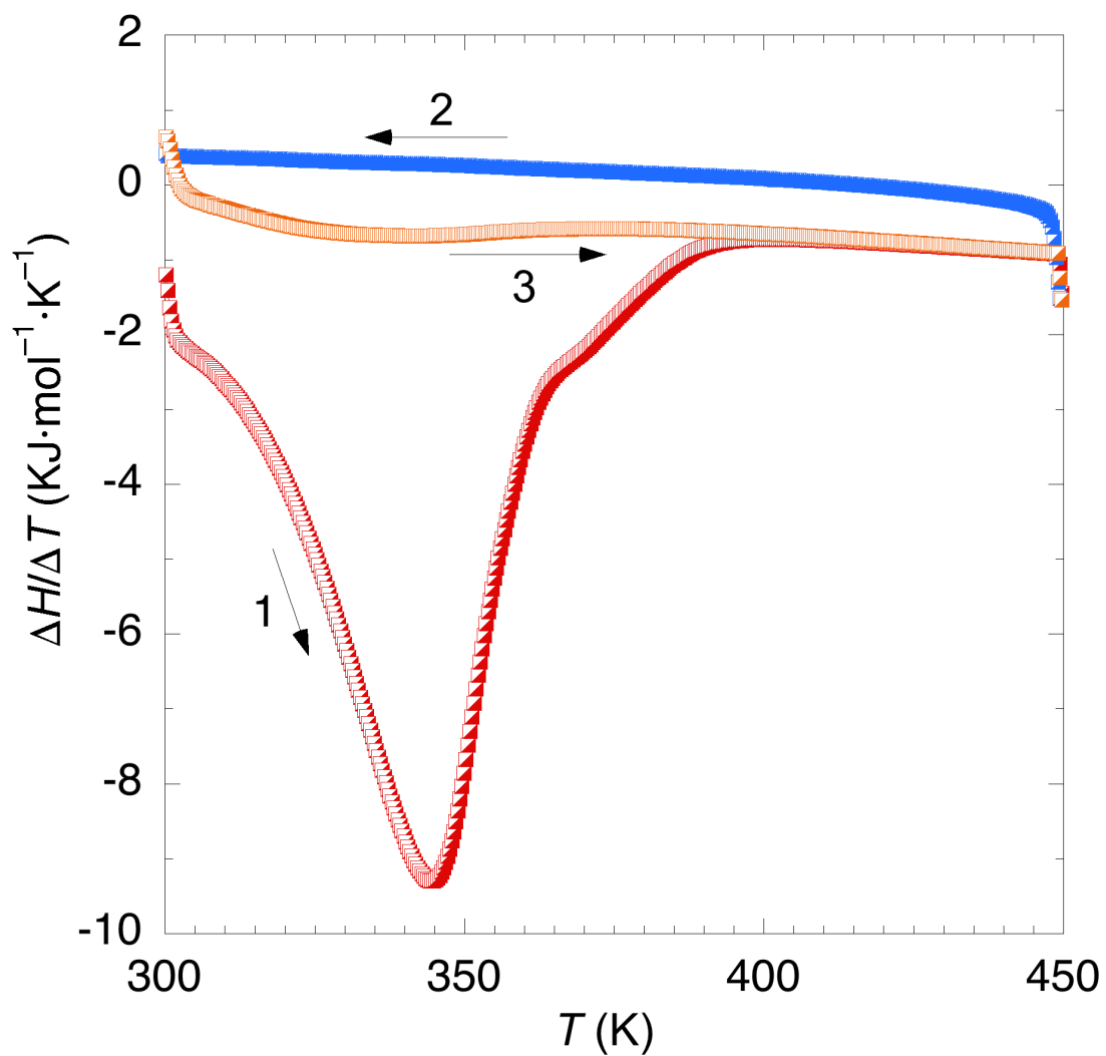

**Fig. S6.** Differential scanning calorimetry of **2**. Curve 1: first heating (dehydration process). Curve 2: first cooling. Curve 3: second heating.

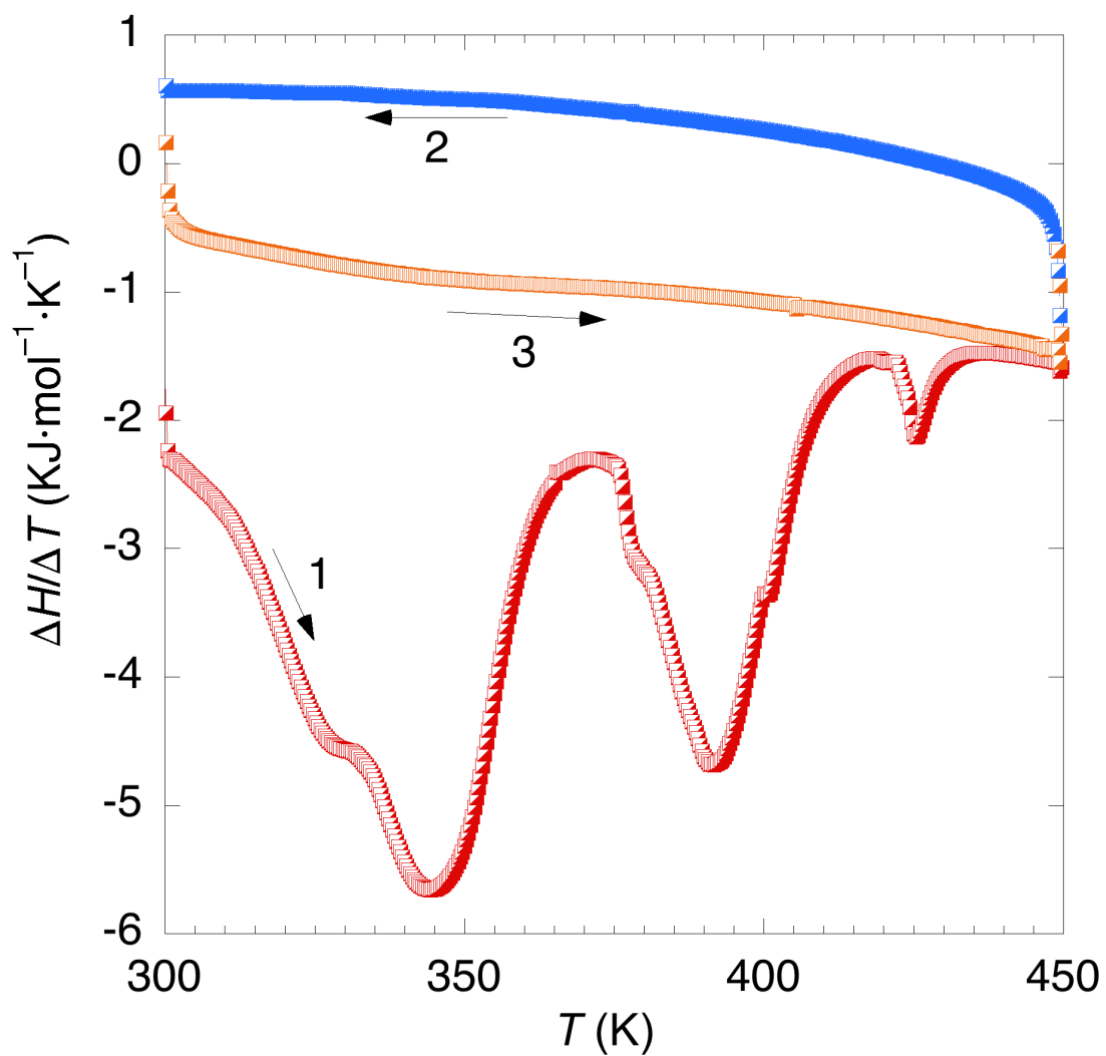

**Fig. S7.** Differential scanning calorimetry of **3**. Curve 1: first heating (dehydration process). Curve 2: first cooling. Curve 3: second heating.

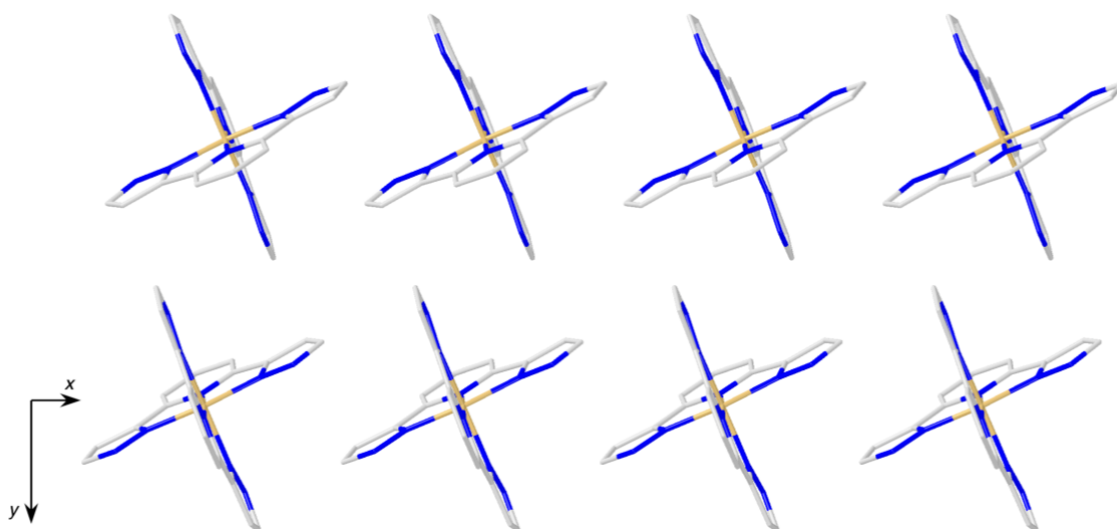

**Fig. S8.** View of the crystal structure of **2** along the *b* axis, emphasizing the  $\pi$ - $\pi$  stacking interactions (shown as dashed lines) between neighbouring  $[\text{Fe}(\text{bpp})_2]^{2+}$  cations. Double chains of cations stacked along the *x* direction can be seen. Water molecules and HBTC anions are omitted.

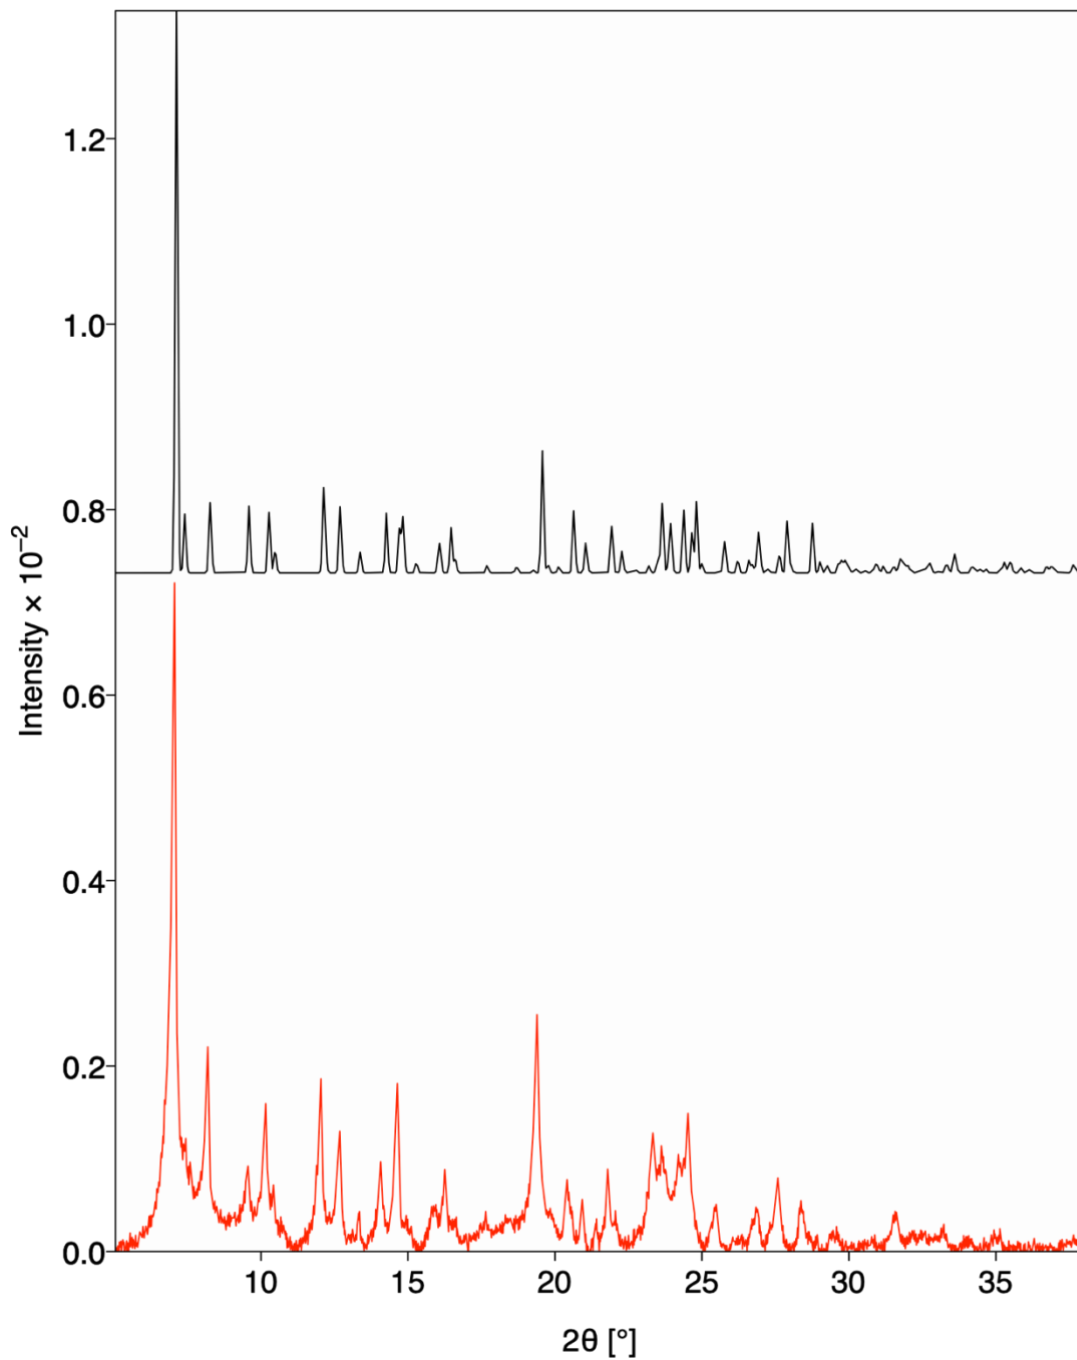

**Fig. S9.** Comparison of the X-ray powder diffractogram of **1** (red line) with the simulation obtained from single crystal data (black line).

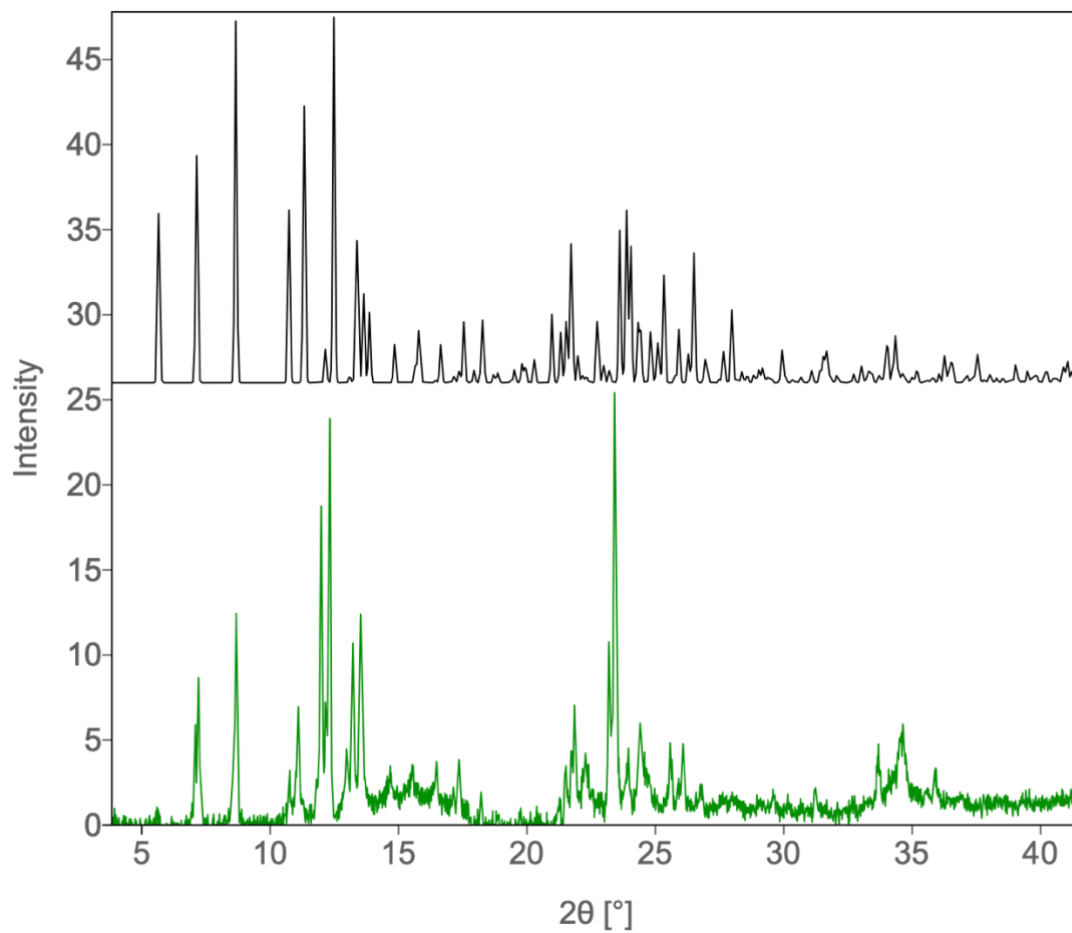

**Fig. S10.** Comparison of the X-ray powder diffractogram of **2** (green line) with the simulation obtained from single crystal data (black line).

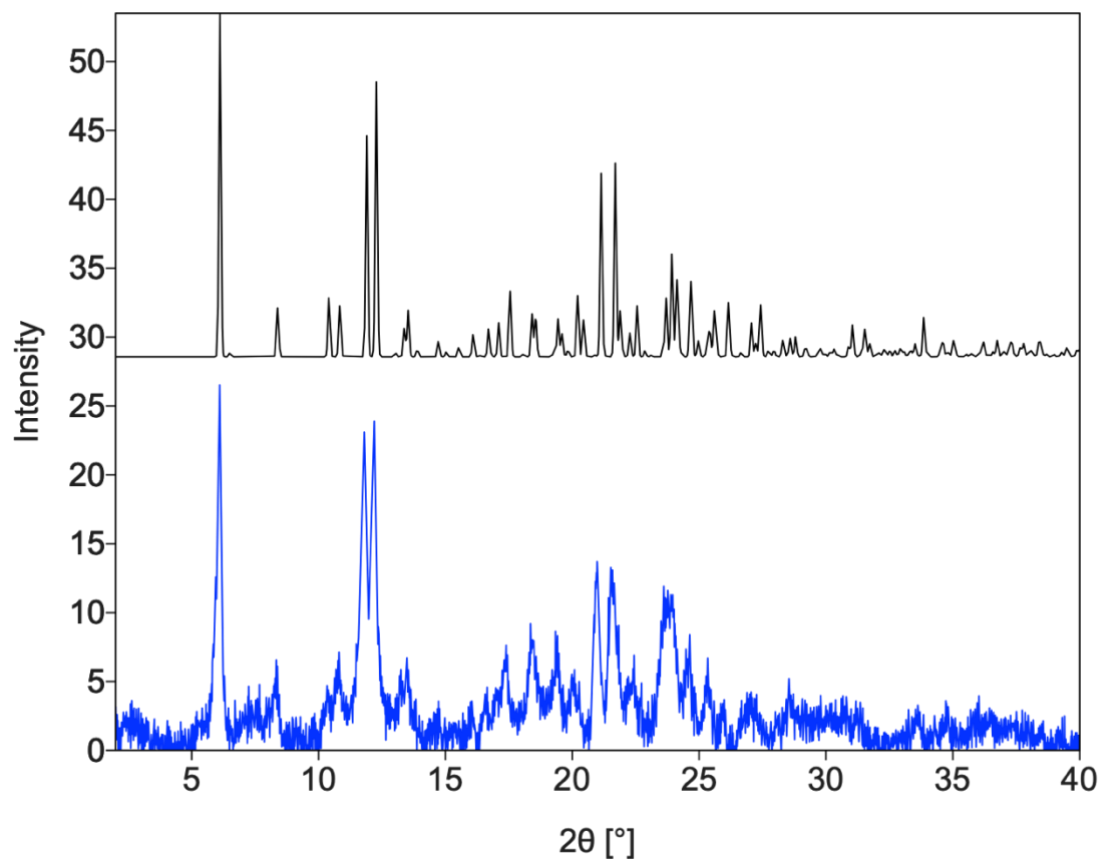

**Fig. S11.** Comparison of the X-ray powder diffractogram of **3** (blue line) with the simulation obtained from single crystal data (black line).
